# Supplementary material
Source: publisher figshare collection journal article supplement (https://acs.figshare.com/ndownloader/files/5431754)
Supplement: Supplementary file 1 [file 5431754]

## Supplementary Information

### Cooling Growth of Millimeter-Size Single-Crystal Bilayer Graphene at Atmospheric Pressure

Haibin Sun<sup>†,‡</sup>, Yan Han<sup>†</sup>, Jun Wu<sup>†</sup>, Yang Lu<sup>‡</sup>, Junqi Xu<sup>‡</sup>, Yongsong Luo<sup>‡</sup>, Fengqi Song<sup>†,§</sup>,

Guanghou Wang<sup>†,§</sup>, Jianguo Wan<sup>\*,†,§</sup>

<sup>†</sup>National Laboratory of Solid State Microstructures and Department of Physics, Nanjing University, Nanjing 210093, China

<sup>‡</sup>Key Laboratory of Advanced Micro/Nano Functional Materials, Department of Physics and Electronic Engineering, Xinyang Normal University, Xinyang 464000, China

<sup>§</sup>Collaborative Innovation Center of Advanced Microstructures, Nanjing University, Nanjing 210093, China

\*Corresponding author (wanjg@nju.edu.cn)

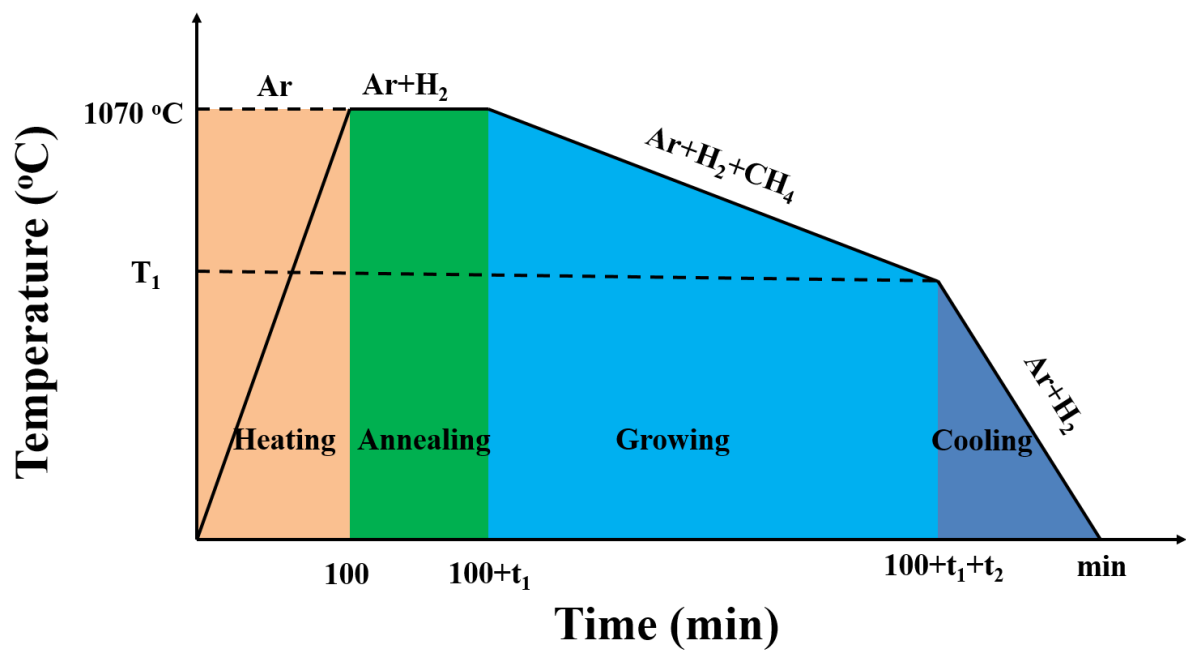

**Figure S1. NI-APCVD growth process and experimental parameters for bilayer graphene production.** A systematic study on nucleation density and synchronization growth property dependence on the different annealing duration ( $t_1$ ), cooling growth duration ( $t_2$ ) and cooling temperature ( $T_1$ ). The plot profile shows growth stage for the growth processes with variable annealing duration ( $t_1$ ) (see Fig. 2), for variable cooling temperature ( $T_1$ ) with variable cooling growth duration ( $t_2$ ) (see Fig. 3) in Ar/H<sub>2</sub> before ramping up to 1070 °C in Ar only for growth.

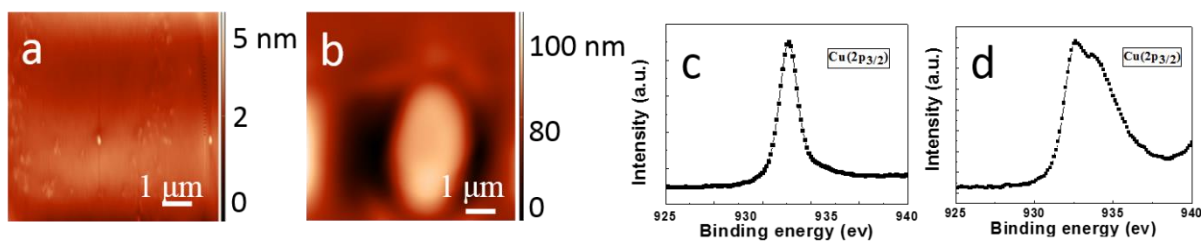

**Figure S2. Morphology characterization of preheating Cu foils with Ar/H<sub>2</sub> and Ar-only.**

AFM images of Cu foils preheated in Ar/H<sub>2</sub> mixture (a) and in Ar-only (b). Cu 2P<sub>3/2</sub> XPS spectra for Cu foils preheated in Ar/H<sub>2</sub> mixture (c) and in Ar-only (d). Preheated Cu foils showed a rather high roughness surface with a surface decorated nanoparticles, which proved that Cu foils have been oxidized after heating in Ar.

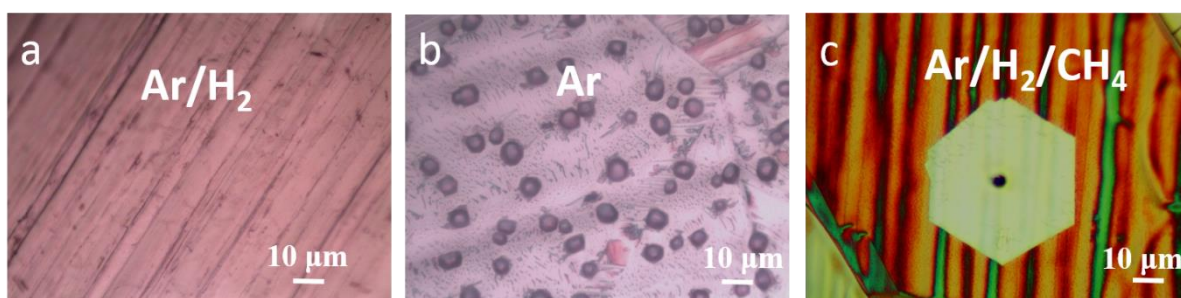

**Figure S3. Optical microscope images of preheating Cu foils.** (a) Preheated in Ar/H<sub>2</sub> mixture. (b) Preheated in Ar-only. (c) Graphene nucleation with the Cu<sub>2</sub>O particle in the center.

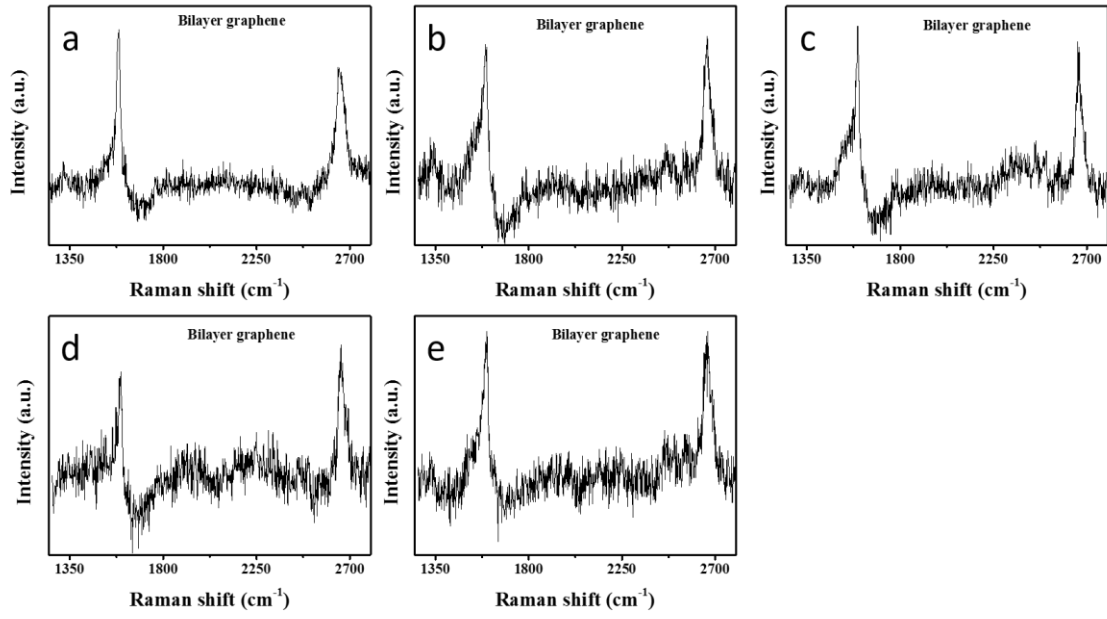

**Figure S4. Raman spectroscopy characterization of graphene grains.** (a-e) Raman spectra obtained from the SEM images in Fig 2 (c-g), there is a one-to-one correspondence between Raman spectra and SEM images, indicating that all samples are the bilayer graphene.

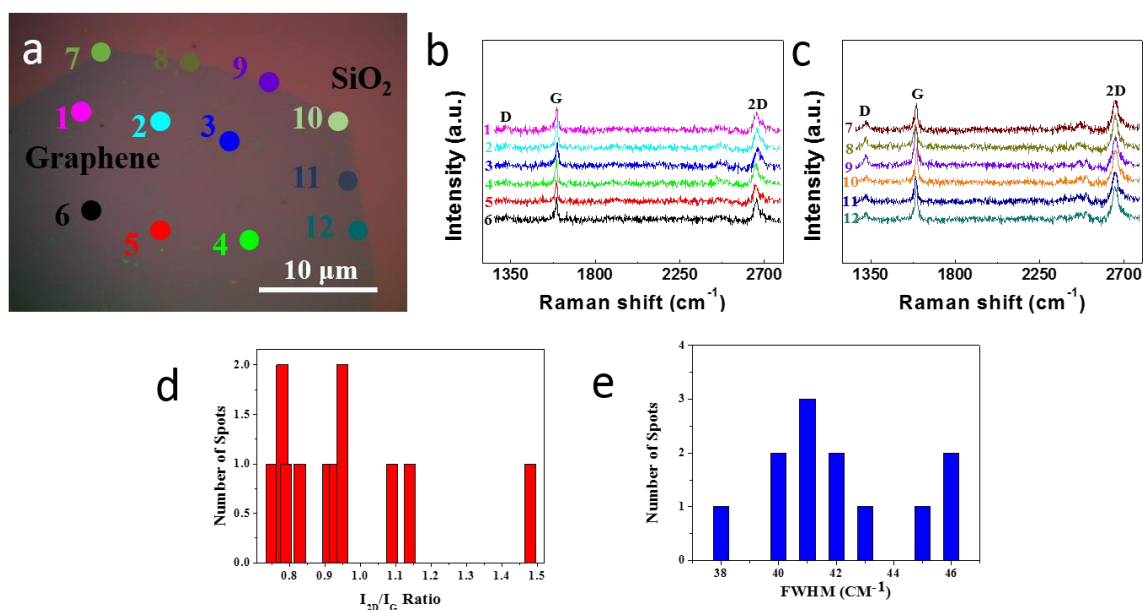

**Figure S5. Raman spectroscopy characterization of the large-scale single-crystal graphene grain.** (a) Optical microscope image of the graphene crystallite transferred to a  $\text{SiO}_2/\text{Si}$  substrate. (b-c). Color-coded stacked Raman spectra corresponding to the spots identified in a. (d-e) Histograms of the Raman spectrum  $I_{2D}/I_G$  ratio and 2D band fwhm values of the bilayer graphene.

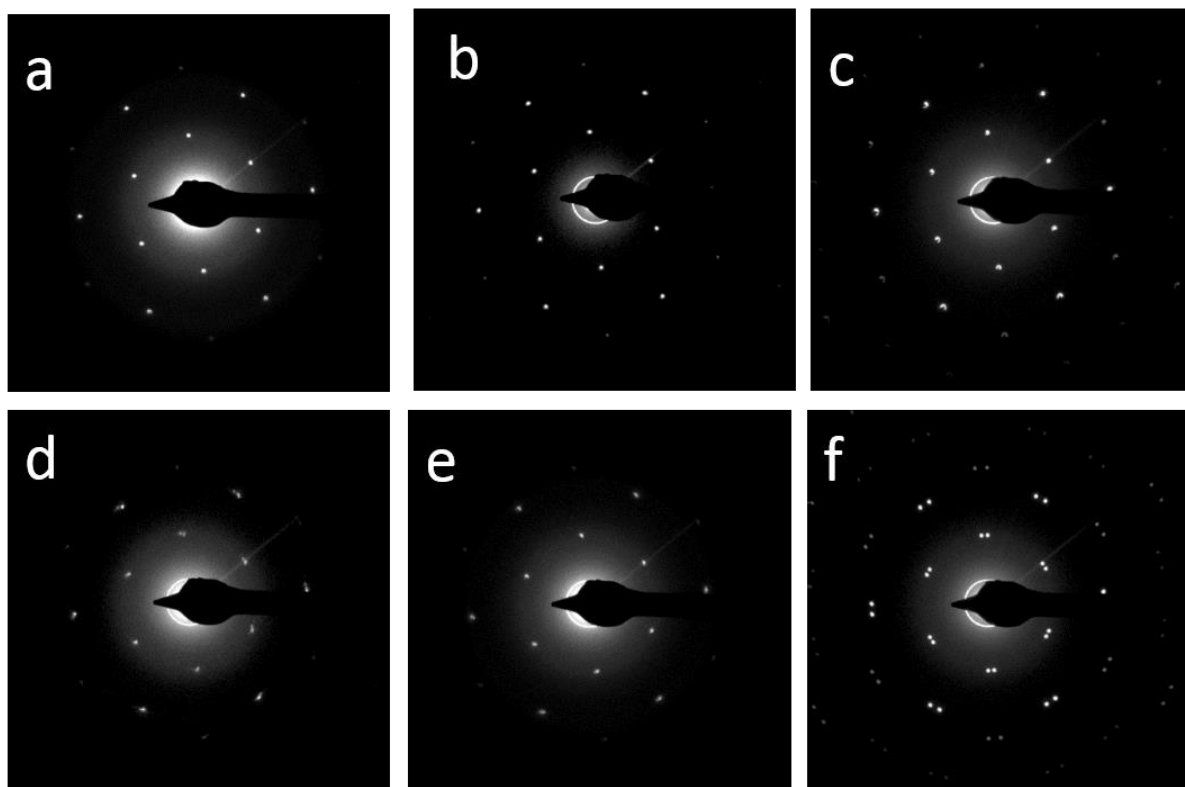

**Figure S6. SAED characterization of graphene grains.** (a-f) SAED patterns taken in different windows of the TEM grid, as shown in Fig 4e, and demonstrate that these points have the same orientations.

**Table S1.** Comparison of the synthesis method and structure properties of single-crystal bilayer graphene domains obtained by CVD.

|   | Substrate | Temperature (°C) | Pressure | Synthesis method                                                                                     | Size (μm) | Shape   | Reference                            |
|---|-----------|------------------|----------|------------------------------------------------------------------------------------------------------|-----------|---------|--------------------------------------|
| 1 | Cu        | 1050             | Low      | High temperature and low pressure of two-step CVD process                                            | 20        | Hexagon | Acs Nano, 2012 <sup>7</sup>          |
| 2 | Cu        | 1030             | Low      | Reduce the flow rate ratio of H <sub>2</sub> /CH <sub>4</sub> to keep lower growth rate              | 410       | Flower  | Nano Lett, 2013 <sup>16</sup>        |
| 3 | Cu        | 1070             | Low      | Maintain a Cu <sub>2</sub> O layer and reduce the flow rate ratio of H <sub>2</sub> /CH <sub>4</sub> | 300       | Hexagon | Nat. Commun, 2013 <sup>17</sup>      |
| 4 | Cu        | 1050             | Ambient  | Oxidize the Cu surface to form Cu <sub>2</sub> O nanoparticles as the growth seeds                   | 540       | Hexagon | Nanoscale, 2015 <sup>18</sup>        |
| 5 | O-rich Cu | 1035             | Low      | Oxygen-activated CVD process                                                                         | 500       | Hexagon | Nat. Nanotechnol, 2016 <sup>33</sup> |
| 6 | Cu        | 1070             | Ambient  | Oxidize the Cu surface and the following nonisothermal growth process                                | 1000      | Hexagon | <b>This manuscript</b>               |



**Table S2.** Summary of Raman spectra of graphene growth from the different synthesis methods.

| Number | Substrate                     | G/2D ratio | D/G ratio | Synthesis method | Layer               |
|--------|-------------------------------|------------|-----------|------------------|---------------------|
| 1      | Graphene/SiO <sub>2</sub> /Si | 1.1        | 0.02      | Fig. 1(c)        | Bilayer graphene    |
| 2      | Graphene/SiO <sub>2</sub> /Si | 1.2        | 0.10      | Fig. 1(e)        | Bilayer graphene    |
| 3      | Graphene/SiO <sub>2</sub> /Si | 1.0        | 0.04      | Fig. 1(f)        | Bilayer graphene    |
| 4      | Graphene/SiO <sub>2</sub> /Si | 0.8        | 0.08      | Fig. 1(g)        | Bilayer graphene    |
| 5      | Graphene/SiO <sub>2</sub> /Si | 1.3        | 0.07      | Fig. 2(c)        | Bilayer graphene    |
| 6      | Graphene/SiO <sub>2</sub> /Si | 0.9        | 0.08      | Fig. 2(d)        | Bilayer graphene    |
| 7      | Graphene/SiO <sub>2</sub> /Si | 1.1        | 0.08      | Fig. 2(e)        | Bilayer graphene    |
| 8      | Graphene/SiO <sub>2</sub> /Si | 0.8        | 0.05      | Fig. 2(f)        | Bilayer graphene    |
| 9      | Graphene/SiO <sub>2</sub> /Si | 1.0        | 0.06      | Fig. 2(g)        | Bilayer graphene    |
| 10     | Graphene/SiO <sub>2</sub> /Si | 0.9        | 0.08      | Fig. 3(a)        | Bilayer graphene    |
| 11     | Graphene/SiO <sub>2</sub> /Si | 1.4        | 1.0       | Fig. 3(b)        | Multilayer graphene |
| 12     | Graphene/SiO <sub>2</sub> /Si | 1.1        | 0.06      | Fig. 3(c)        | Bilayer graphene    |

|           |                               |     |      |           |                     |
|-----------|-------------------------------|-----|------|-----------|---------------------|
| <b>13</b> | Graphene/SiO <sub>2</sub> /Si | 1.1 | 0.05 | Fig. 3(d) | Bilayer graphene    |
| <b>14</b> | Graphene/SiO <sub>2</sub> /Si | 1.7 | 0.08 | Fig. 3(e) | Multilayer graphene |
| <b>15</b> | Graphene/SiO <sub>2</sub> /Si | 1.3 | 0.08 | Fig. 3(f) | Bilayer graphene    |
| <b>16</b> | Graphene/SiO <sub>2</sub> /Si | 1.1 | 0.04 | Fig. 3(g) | Bilayer graphene    |
| <b>17</b> | Graphene/SiO <sub>2</sub> /Si | 1.0 | 0.08 | Fig. 3(h) | Bilayer graphene    |
| <b>18</b> | Graphene/SiO <sub>2</sub> /Si | 1.3 | 0.02 | Fig. S5-1 | Bilayer graphene    |
| <b>19</b> | Graphene/SiO <sub>2</sub> /Si | 1.3 | 0.02 | Fig. S5-2 | Bilayer graphene    |
| <b>20</b> | Graphene/SiO <sub>2</sub> /Si | 1.3 | 0.02 | Fig. S5-3 | Bilayer graphene    |
| <b>21</b> | Graphene/SiO <sub>2</sub> /Si | 1.2 | 0.02 | Fig. S5-4 | Bilayer graphene    |
| <b>22</b> | Graphene/SiO <sub>2</sub> /Si | 1.1 | 0.02 | Fig. S5-5 | Bilayer graphene    |
| <b>23</b> | Graphene/SiO <sub>2</sub> /Si | 1.1 | 0.02 | Fig. S5-6 | Bilayer graphene    |
| <b>24</b> | Graphene/SiO <sub>2</sub> /Si | 1.3 | 0.08 | Fig. S5-7 | Bilayer graphene    |
| <b>25</b> | Graphene/SiO <sub>2</sub> /Si | 1.1 | 0.08 | Fig. S5-8 | Bilayer graphene    |
| <b>26</b> | Graphene/SiO <sub>2</sub> /Si | 0.9 | 0.08 | Fig. S5-9 | Bilayer graphene    |

|           |                               |     |      |            |                  |
|-----------|-------------------------------|-----|------|------------|------------------|
| <b>27</b> | Graphene/SiO <sub>2</sub> /Si | 0.9 | 0.08 | Fig. S5-10 | Bilayer graphene |
| <b>28</b> | Graphene/SiO <sub>2</sub> /Si | 0.7 | 1.0  | Fig. S5-11 | Bilayer graphene |
| <b>29</b> | Graphene/SiO <sub>2</sub> /Si | 1.1 | 0.08 | Fig. S5-12 | Bilayer graphene |
